# Supplementary material
Source: PubMed Central journal article supplement (PMC3494267)
Supplement: supp_mss171_Supplementary_tables.pdf [file supp_mss171_Supplementary_tables.pdf]

**Table S1.** Fitting polynomial equations to ACE<sub>u</sub> distributions.

| Polynomial Order | <i>E. coli</i> to <i>S. enterica</i> |              | <i>S. enterica</i> to <i>E. coli</i> |            |
|------------------|--------------------------------------|--------------|--------------------------------------|------------|
|                  | Pearson R                            | $\Delta R^a$ | Pearson R                            | $\Delta R$ |
| 1                | 0.8885                               |              | 0.8885                               |            |
| 2                | 0.9028                               | 0.0143       | 0.8892                               | 0.0007     |
| 3                | 0.9029                               | 0.0001       | 0.8942                               | 0.0050     |
| 4                | 0.9029                               | 0.0001       | 0.8952                               | 0.0010     |
| 5                | 0.9029                               | 0.0000       | 0.8957                               | 0.0005     |
| 6                | 0.9030                               | 0.0001       | 0.8960                               | 0.0003     |

a. Difference between successive R values.

**Table S2.** Pearson R values for second-order polynomial regression of ACE values of 2235 orthologous genes among 8 taxa. The independent variable is listed on the left, while the dependent variable is listed across the top. The upper table reports correlation of ACE<sub>z</sub> values, while the lower table from the correlations for ACE<sub>u</sub> values.

| ACE <sub>z</sub> | Eco <sup>a</sup> | Efe   | Sty   | Saz   | Cro   | Cko   | Ecl   | Ctu   |
|------------------|------------------|-------|-------|-------|-------|-------|-------|-------|
| Eco              | 1.000            | 0.958 | 0.910 | 0.904 | 0.885 | 0.913 | 0.893 | 0.841 |
| Efe              | 0.959            | 1.000 | 0.905 | 0.898 | 0.869 | 0.904 | 0.879 | 0.822 |
| Sty              | 0.905            | 0.898 | 1.000 | 0.970 | 0.902 | 0.919 | 0.883 | 0.851 |
| Saz              | 0.898            | 0.890 | 0.970 | 1.000 | 0.896 | 0.918 | 0.877 | 0.853 |
| Cro              | 0.879            | 0.859 | 0.900 | 0.894 | 1.000 | 0.905 | 0.889 | 0.887 |
| Cko              | 0.913            | 0.901 | 0.923 | 0.922 | 0.911 | 1.000 | 0.913 | 0.872 |
| Ecl              | 0.896            | 0.879 | 0.891 | 0.887 | 0.899 | 0.916 | 1.000 | 0.896 |
| Ctu              | 0.830            | 0.807 | 0.843 | 0.845 | 0.882 | 0.858 | 0.881 | 1.000 |

  

| ACE <sub>u</sub> | Eco   | Efe   | Sty   | Saz   | Cro   | Cko   | Ecl   | Ctu   |
|------------------|-------|-------|-------|-------|-------|-------|-------|-------|
| Eco              | 1.000 | 0.950 | 0.903 | 0.894 | 0.885 | 0.906 | 0.884 | 0.852 |
| Efe              | 0.953 | 1.000 | 0.900 | 0.891 | 0.876 | 0.898 | 0.871 | 0.841 |
| Sty              | 0.889 | 0.880 | 1.000 | 0.967 | 0.904 | 0.907 | 0.873 | 0.865 |
| Saz              | 0.879 | 0.869 | 0.966 | 1.000 | 0.897 | 0.905 | 0.866 | 0.862 |
| Cro              | 0.861 | 0.843 | 0.892 | 0.886 | 1.000 | 0.892 | 0.878 | 0.887 |
| Cko              | 0.898 | 0.842 | 0.912 | 0.910 | 0.909 | 1.000 | 0.899 | 0.878 |
| Ecl              | 0.881 | 0.862 | 0.884 | 0.879 | 0.901 | 0.905 | 1.000 | 0.895 |
| Ctu              | 0.818 | 0.795 | 0.844 | 0.842 | 0.882 | 0.851 | 0.867 | 1.000 |

a. Taxa are: Eco, *Escherichia coli*; Efe, *E. fergusonii*; Sty, *Salmonella enterica* Typhimurium; Saz, *S. enterica* Arizonae; Cro, *Citrobacter rodentium*; Cko, *C. koseri*; Ecl, *Enterobacter cloacae*; Ctu, *Cronobacter turicensis*.

**Table S3.** ANOVA variances for differences in  $ACE_u$  values for 1166 genes within and between 390 operons among 17 genomes.

|     | Cko      | Cro      | Ctu      | Dze      | Ecl      | Esp      | Eam      | Eta      | Eco      | Efe      | Kpn      | Kva      | Pwa      | Saz      | Sty      | Spr      | Yen      |
|-----|----------|----------|----------|----------|----------|----------|----------|----------|----------|----------|----------|----------|----------|----------|----------|----------|----------|
| Cko | 3.64E-50 | 3.10E-02 | 1.59E-05 | 9.98E-07 | 3.91E-05 | 9.38E-05 | 2.19E-06 | 3.62E-06 | 1.79E-02 | 1.23E-05 | 1.92E-04 | 2.69E-06 | 1.64E-04 | 3.39E-01 | 6.09E-02 | 2.02E-03 | 4.08E-06 |
| Cro |          | 3.79E-62 | 1.83E-02 | 4.23E-07 | 3.85E-06 | 5.09E-07 | 3.91E-03 | 2.07E-03 | 3.32E-06 | 4.95E-10 | 9.23E-03 | 1.05E-02 | 9.39E-07 | 6.59E-03 | 6.60E-05 | 1.06E-03 | 2.58E-05 |
| Ctu |          |          | 4.82E-72 | 6.18E-11 | 7.54E-06 | 4.33E-06 | 2.09E-02 | 6.88E-03 | 4.78E-10 | 3.02E-13 | 8.68E-03 | 5.55E-03 | 4.82E-08 | 2.37E-04 | 1.67E-06 | 6.06E-04 | 2.12E-06 |
| Dze |          |          |          | 1.41E-53 | 1.42E-07 | 1.72E-08 | 7.76E-05 | 4.37E-05 | 2.20E-11 | 7.00E-14 | 2.79E-08 | 1.41E-08 | 5.21E-04 | 1.29E-04 | 4.02E-05 | 1.94E-07 | 3.56E-11 |
| Ecl |          |          |          |          | 2.52E-46 | 1.97E-03 | 6.08E-05 | 6.60E-05 | 1.63E-03 | 5.76E-07 | 1.97E-04 | 3.31E-04 | 5.30E-05 | 1.75E-03 | 4.48E-04 | 3.49E-03 | 4.87E-03 |
| Esp |          |          |          |          |          | 1.16E-47 | 5.62E-04 | 1.46E-05 | 5.91E-05 | 3.98E-08 | 2.65E-05 | 5.02E-05 | 7.54E-06 | 1.16E-02 | 9.43E-04 | 1.78E-05 | 2.02E-04 |
| Eam |          |          |          |          |          |          | 1.67E-47 | 3.39E-01 | 1.29E-12 | 5.45E-14 | 8.50E-03 | 1.56E-03 | 1.52E-03 | 2.16E-08 | 3.61E-08 | 4.49E-02 | 1.48E-04 |
| Eta |          |          |          |          |          |          |          | 6.95E-56 | 1.90E-13 | 1.19E-15 | 6.45E-03 | 1.88E-03 | 9.13E-05 | 3.41E-07 | 2.83E-07 | 1.04E-01 | 8.47E-06 |
| Eco |          |          |          |          |          |          |          |          | 1.38E-39 | 2.26E-02 | 1.83E-08 | 4.32E-10 | 8.29E-08 | 7.03E-03 | 7.18E-03 | 1.07E-07 | 4.36E-03 |
| Efe |          |          |          |          |          |          |          |          |          | 9.10E-41 | 4.49E-09 | 5.08E-12 | 2.88E-10 | 4.08E-03 | 2.98E-03 | 5.48E-10 | 9.90E-04 |
| Kpn |          |          |          |          |          |          |          |          |          |          | 5.56E-70 | 8.11E-01 | 2.72E-05 | 4.90E-02 | 2.60E-03 | 4.34E-02 | 2.98E-04 |
| Kva |          |          |          |          |          |          |          |          |          |          |          | 3.28E-77 | 6.51E-07 | 2.56E-04 | 1.72E-06 | 1.42E-02 | 1.13E-06 |
| Pwa |          |          |          |          |          |          |          |          |          |          |          |          | 7.03E-47 | 1.33E-04 | 1.16E-05 | 1.46E-05 | 6.33E-06 |
| Saz |          |          |          |          |          |          |          |          |          |          |          |          |          | 1.49E-59 | 1.97E-01 | 3.74E-03 | 3.06E-04 |
| Sty |          |          |          |          |          |          |          |          |          |          |          |          |          |          | 9.19E-63 | 5.35E-04 | 3.06E-04 |
| Spr |          |          |          |          |          |          |          |          |          |          |          |          |          |          |          | 4.86E-48 | 5.91E-04 |
| Yen |          |          |          |          |          |          |          |          |          |          |          |          |          |          |          |          | 8.46E-38 |

- Taxa are: Cko, *Citrobacter koseri*; Cro, *Citrobacter rodentium*; Ctu, *Cronobacter turicensis*; Dze, *Dickeya zeae*; Ecl, *Enterobacter cloacae*; Esp, *Enterobacter* sp. 638; Eam, *Er. amylovora*; Eta, *Erwinia tasmaniensis*; Eco, *Escherichia coli*; Efe, *E. fergusonii*; Kpn, *K. pneumonia*; Kva, *Klebsiella varicola*; Pwa, *Pectobacterium wasabiae*; Sty, *Salmonella enterica* Typhimurium; Saz, *S. enterica* Arizonae; Spr, *Serratia proteamaculans*; Yen, *Yersinia enterocolitica*.
- Values on the diagonal report P-values of the ANOVA F statistic testing for similarity among  $ACE_u$  values for genes in the same operon. Significant values indicate clustering of genes with similar  $ACE_u$  values.
- Values off the diagonal report P-values of the ANOVA F statistic testing for differences in the  $ACE_u$  values for cognate operons in different species. Significant values indicate a change in the  $ACE_u$  value between species.

**Table S4.** Operons with significant change in  $ACE_u$  values between species. A total of 523 operons were examined.

| Comparison           | P < 0.05        |                    |                   | P < 0.01 |          |        | P < 0.002 |          |        |
|----------------------|-----------------|--------------------|-------------------|----------|----------|--------|-----------|----------|--------|
|                      | Count           | Fraction           | Excess            | Count    | Fraction | Excess | Count     | Fraction | Excess |
| Cro-Cko <sup>a</sup> | 29 <sup>b</sup> | 0.055 <sup>c</sup> | 1.11 <sup>d</sup> | 6        | 0.011    | 1.15   | 4         | 0.008    | 3.82   |
| Cro-Ecl              | 46              | 0.088              | 1.76              | 15       | 0.029    | 2.87   | 7         | 0.013    | 6.69   |
| Cro-Eco              | 81              | 0.155              | 3.10              | 39       | 0.075    | 7.46   | 21        | 0.040    | 20.08  |
| Cro-Sen              | 53              | 0.101              | 2.03              | 19       | 0.036    | 3.63   | 10        | 0.019    | 9.56   |
| Cro-Sty              | 46              | 0.088              | 1.76              | 14       | 0.027    | 2.68   | 7         | 0.013    | 6.69   |
| Cro-Efe              | 98              | 0.187              | 3.75              | 51       | 0.098    | 9.75   | 26        | 0.050    | 24.86  |
| Cro-Ctu              | 67              | 0.128              | 2.56              | 31       | 0.059    | 5.93   | 18        | 0.034    | 17.21  |
| Cko-Ecl              | 42              | 0.080              | 1.61              | 15       | 0.029    | 2.87   | 9         | 0.017    | 8.60   |
| Cko-Eco              | 59              | 0.113              | 2.26              | 27       | 0.052    | 5.16   | 13        | 0.025    | 12.43  |
| Cko-Sen              | 24              | 0.046              | 0.92              | 4        | 0.008    | 0.76   | 1         | 0.002    | 0.96   |
| Cko-Sty              | 18              | 0.034              | 0.69              | 5        | 0.010    | 0.96   | 3         | 0.006    | 2.87   |
| Cko-Efe              | 65              | 0.124              | 2.49              | 26       | 0.050    | 4.97   | 15        | 0.029    | 14.34  |
| Cko-Ctu              | 89              | 0.170              | 3.40              | 48       | 0.092    | 9.18   | 30        | 0.057    | 28.68  |
| Ecl-Eco              | 81              | 0.155              | 3.10              | 35       | 0.067    | 6.69   | 21        | 0.040    | 20.08  |
| Ecl-Sen              | 66              | 0.126              | 2.52              | 35       | 0.067    | 6.69   | 21        | 0.040    | 20.08  |
| Ecl-Sty              | 69              | 0.132              | 2.64              | 32       | 0.061    | 6.12   | 16        | 0.031    | 15.30  |
| Ecl-Efe              | 92              | 0.176              | 3.52              | 42       | 0.080    | 8.03   | 24        | 0.046    | 22.94  |
| Ecl-Ctu              | 56              | 0.107              | 2.14              | 24       | 0.046    | 4.59   | 15        | 0.029    | 14.34  |
| Eco-Sen              | 60              | 0.115              | 2.29              | 21       | 0.040    | 4.02   | 7         | 0.013    | 6.69   |
| Eco-Sty              | 61              | 0.117              | 2.33              | 20       | 0.038    | 3.82   | 10        | 0.019    | 9.56   |
| Eco-Efe              | 9               | 0.017              | 0.34              | 2        | 0.004    | 0.38   | 1         | 0.002    | 0.96   |
| Eco-Ctu              | 122             | 0.233              | 4.67              | 78       | 0.149    | 14.91  | 55        | 0.105    | 52.58  |
| Sen-Sty              | 2               | 0.004              | 0.08              | 1        | 0.002    | 0.19   | 0         | 0.000    | 0.00   |
| Sen-Efe              | 61              | 0.117              | 2.33              | 26       | 0.050    | 4.97   | 10        | 0.019    | 9.56   |
| Sen-Ctu              | 110             | 0.210              | 4.21              | 67       | 0.128    | 12.81  | 43        | 0.082    | 41.11  |
| Sty-Efe              | 62              | 0.119              | 2.37              | 29       | 0.055    | 5.54   | 11        | 0.021    | 10.52  |
| Sty-Ctu              | 104             | 0.199              | 3.98              | 65       | 0.124    | 12.43  | 44        | 0.084    | 42.07  |
| Efe-Ctu              | 125             | 0.239              | 4.78              | 78       | 0.149    | 14.91  | 62        | 0.119    | 59.27  |

- Taxon designations as in Table S3.
- The number of operons whose  $ACE_u$  value exceeds the critical probability.
- The fraction of the genome represented by the operons with excess difference in  $ACE_u$  values.
- The ratio of the number of operons with the given level of  $ACE_u$  difference to the number expected.

**Table S5.** Operons and genes with significant change in  $ACE_u$  values between *E. coli* and *S. enterica*. A total of 665 operons and 3072 individual genes were examined.

| Threshold | Number of Operons |          |        | Fraction Observed | Fold Excess |
|-----------|-------------------|----------|--------|-------------------|-------------|
|           | Observed          | Expected | Excess |                   |             |
| 0.2       | 200               | 133.0    | 67.0   | 0.301             | 1.50        |
| 0.1       | 126               | 66.5     | 59.5   | 0.189             | 1.89        |
| 0.05      | 82                | 33.3     | 48.8   | 0.123             | 2.47        |
| 0.02      | 51                | 13.3     | 37.7   | 0.077             | 3.83        |
| 0.01      | 33                | 6.7      | 26.4   | 0.050             | 4.96        |
| 0.005     | 21                | 3.3      | 17.7   | 0.032             | 6.32        |
| 0.002     | 15                | 1.3      | 13.7   | 0.023             | 11.28       |
| 0.001     | 15                | 0.7      | 14.3   | 0.023             | 22.56       |

  

| Threshold | Number of Genes |          |        | Fraction Observed | Fold Excess |
|-----------|-----------------|----------|--------|-------------------|-------------|
|           | Observed        | Expected | Excess |                   |             |
| 0.2       | 170             | 133.0    | 37.0   | 0.256             | 1.28        |
| 0.1       | 106             | 66.5     | 39.5   | 0.159             | 1.59        |
| 0.05      | 63              | 33.3     | 29.8   | 0.095             | 1.89        |
| 0.02      | 40              | 13.3     | 26.7   | 0.060             | 3.01        |
| 0.01      | 32              | 6.7      | 25.4   | 0.048             | 4.81        |
| 0.005     | 20              | 3.3      | 16.7   | 0.030             | 6.02        |
| 0.002     | 11              | 1.3      | 9.7    | 0.017             | 8.27        |
| 0.001     | 10              | 0.7      | 9.3    | 0.015             | 15.04       |

**Table S6.** Tetrad Analyses. Relationships were inferred from sets of orthologous genes found in species residing in different habitats.

| Species                              | Family                | Environment      | Tetrad Supported      |                          |
|--------------------------------------|-----------------------|------------------|-----------------------|--------------------------|
|                                      |                       |                  | Proteins <sup>a</sup> | Codon Usage <sup>b</sup> |
| <i>Bifidobacterium longum</i>        | Bifidobacteriaceae    | Gastrointestinal | (Cin,Cge), (Blo,Mcu)  | (Blo,Cin), (Mcu,Cge)     |
| <i>Collinsella intestinalis</i>      | Coriobacteriaceae     | Gastrointestinal |                       |                          |
| <i>Mobiluncus curtisii</i>           | Actinomycetaceae      | Urogenital       |                       |                          |
| <i>Corynebacterium genitalium</i>    | Corynebacteriaceae    | Urogenital       |                       |                          |
| <i>Staphylococcus aureus</i>         | Staphylococcaceae     | Skin             | (Sau,Edo), (Pan,Chy)  | (Sau,Pan), (Chy,Edo)     |
| <i>Peptostreptococcus anaerobius</i> | Peptostreptococcaceae | Skin             |                       |                          |
| <i>Clostridium hylemonae</i>         | Clostridiaceae        | Gastrointestinal |                       |                          |
| <i>Eubacterium dolichum</i>          | Eubacteriaceae        | Gastrointestinal |                       |                          |
| <i>Oribacterium sinus</i>            | Lachnospiraceae       | Oral             | (Osi,Lre), (Gel,Efa)  | (Osi,Gel), (Lre,Efa)     |
| <i>Granulicatella elegans</i>        | Carnobacteriaceae     | Oral             |                       |                          |
| <i>Lactobacillus reuteri</i>         | Lactobacillaceae      | Gastrointestinal |                       |                          |
| <i>Enterococcus faecalis</i>         | Enterococcaceae       | Gastrointestinal |                       |                          |

a. Neighbor-Joining tree were inferred from overall similarity of orthologous proteins.

b. Neighbor-Joining trees were inferred from correlations of ACE<sub>u</sub> values among orthologous protein-coding genes.

**Table S7.** Excess of genes showing changes in codon selection as a function of strand identity among 2235

genes shared among 8 taxa.

| Comparison           | Total Genes    |                     | Genes with significant change<br>in $ACE_u$ ( $P < 0.01$ ) |                     | Fraction of Genes With<br>Significant Change in $ACE_u$ |                      |
|----------------------|----------------|---------------------|------------------------------------------------------------|---------------------|---------------------------------------------------------|----------------------|
|                      | Same<br>Strand | Different<br>Strand | Same<br>Strand                                             | Different<br>Strand | All<br>Genes                                            | Same Strand<br>Genes |
| Cro-Cko <sup>a</sup> | 2068           | 167                 | 32                                                         | 2                   | 0.015                                                   | 0.015                |
| Cro-Ecl              | 2064           | 171                 | 27                                                         | 5                   | 0.014                                                   | 0.013                |
| Cro-Eco              | 2068           | 167                 | 111                                                        | 11                  | 0.055                                                   | 0.054                |
| Cro-Sen              | 2066           | 169                 | 37                                                         | 3                   | 0.018                                                   | 0.018                |
| Cro-Sty              | 2066           | 169                 | 32                                                         | 6                   | 0.017                                                   | 0.015                |
| Cro-Efe              | 2072           | 163                 | 108                                                        | 10                  | 0.053                                                   | 0.052                |
| Cro-Ctu              | 2065           | 170                 | 54                                                         | 8                   | 0.028                                                   | 0.026                |
| Cko-Ecl              | 2229           | 6                   | 43                                                         | 0                   | 0.019                                                   | 0.019                |
| Cko-Eco              | 2233           | 2                   | 68                                                         | 0                   | 0.030                                                   | 0.030                |
| Cko-Sen              | 2231           | 4                   | 20                                                         | 1                   | 0.009                                                   | 0.009                |
| Cko-Sty              | 2231           | 4                   | 23                                                         | 1                   | 0.011                                                   | 0.010                |
| Cko-Efe              | 2229           | 6                   | 71                                                         | 0                   | 0.032                                                   | 0.032                |
| Cko-Ctu              | 2220           | 15                  | 103                                                        | 1                   | 0.047                                                   | 0.046                |
| Ecl-Eco              | 2227           | 8                   | 111                                                        | 1                   | 0.050                                                   | 0.050                |
| Ecl-Sen              | 2225           | 10                  | 72                                                         | 1                   | 0.033                                                   | 0.032                |
| Ecl-Sty              | 2225           | 10                  | 75                                                         | 1                   | 0.034                                                   | 0.034                |
| Ecl-Efe              | 2223           | 12                  | 125                                                        | 0                   | 0.056                                                   | 0.056                |
| Ecl-Ctu              | 2216           | 19                  | 64                                                         | 0                   | 0.029                                                   | 0.029                |
| Eco-Sen              | 2231           | 4                   | 64                                                         | 2                   | 0.030                                                   | 0.029                |
| Eco-Sty              | 2231           | 4                   | 69                                                         | 2                   | 0.032                                                   | 0.031                |
| Eco-Efe              | 2229           | 6                   | 5                                                          | 1                   | 0.003                                                   | 0.002                |
| Eco-Ctu              | 2220           | 15                  | 205                                                        | 1                   | 0.092                                                   | 0.092                |
| Sen-Sty              | 2233           | 2                   | 2                                                          | 0                   | 0.001                                                   | 0.001                |
| Sen-Efe              | 2227           | 8                   | 69                                                         | 2                   | 0.032                                                   | 0.031                |
| Sen-Ctu              | 2218           | 17                  | 111                                                        | 2                   | 0.051                                                   | 0.050                |
| Sty-Efe              | 2229           | 6                   | 60                                                         | 2                   | 0.028                                                   | 0.027                |
| Sty-Ctu              | 2218           | 17                  | 131                                                        | 3                   | 0.060                                                   | 0.059                |
| Efe-Ctu              | 2216           | 19                  | 228                                                        | 2                   | 0.103                                                   | 0.103                |

a. Taxon designations as in Table S3.

**Table S8.** Excess of genes showing changes in codon selection as a function of support for species tree among 2235 genes shared among 8 taxa.

| Comparison           | Genes with significant change in $ACE_u$ ( $P < 0.01$ ) |              |                                           | Fraction of Genes With Significant Change in $ACE_u$ |              |
|----------------------|---------------------------------------------------------|--------------|-------------------------------------------|------------------------------------------------------|--------------|
|                      | All Genes                                               | Native Genes | Potentially Xenologous Genes <sup>b</sup> | All Genes                                            | Native genes |
| Cro-Cko <sup>a</sup> | 34                                                      | 33           | 1                                         | 0.015                                                | 0.015        |
| Cro-Ecl              | 32                                                      | 32           | 0                                         | 0.014                                                | 0.014        |
| Cro-Eco              | 122                                                     | 121          | 1                                         | 0.055                                                | 0.055        |
| Cro-Sen              | 40                                                      | 40           | 0                                         | 0.018                                                | 0.018        |
| Cro-Sty              | 38                                                      | 38           | 0                                         | 0.017                                                | 0.017        |
| Cro-Efe              | 118                                                     | 115          | 3                                         | 0.053                                                | 0.052        |
| Cro-Ctu              | 62                                                      | 62           | 0                                         | 0.028                                                | 0.028        |
| Cko-Ecl              | 43                                                      | 42           | 1                                         | 0.019                                                | 0.019        |
| Cko-Eco              | 68                                                      | 65           | 3                                         | 0.030                                                | 0.029        |
| Cko-Sen              | 21                                                      | 21           | 0                                         | 0.009                                                | 0.010        |
| Cko-Sty              | 24                                                      | 22           | 2                                         | 0.011                                                | 0.010        |
| Cko-Efe              | 71                                                      | 68           | 3                                         | 0.032                                                | 0.031        |
| Cko-Ctu              | 104                                                     | 103          | 1                                         | 0.047                                                | 0.047        |
| Ecl-Eco              | 112                                                     | 111          | 1                                         | 0.050                                                | 0.050        |
| Ecl-Sen              | 73                                                      | 72           | 1                                         | 0.033                                                | 0.033        |
| Ecl-Sty              | 76                                                      | 75           | 1                                         | 0.034                                                | 0.034        |
| Ecl-Efe              | 125                                                     | 123          | 2                                         | 0.056                                                | 0.056        |
| Ecl-Ctu              | 64                                                      | 64           | 0                                         | 0.029                                                | 0.029        |
| Eco-Sen              | 66                                                      | 64           | 2                                         | 0.030                                                | 0.029        |
| Eco-Sty              | 71                                                      | 69           | 2                                         | 0.032                                                | 0.031        |
| Eco-Efe              | 6                                                       | 4            | 2                                         | 0.003                                                | 0.002        |
| Eco-Ctu              | 206                                                     | 204          | 2                                         | 0.092                                                | 0.092        |
| Sen-Sty              | 2                                                       | 2            | 0                                         | 0.001                                                | 0.001        |
| Sen-Efe              | 71                                                      | 70           | 1                                         | 0.032                                                | 0.032        |
| Sen-Ctu              | 113                                                     | 111          | 2                                         | 0.051                                                | 0.050        |
| Sty-Efe              | 62                                                      | 61           | 1                                         | 0.028                                                | 0.028        |
| Sty-Ctu              | 134                                                     | 133          | 1                                         | 0.060                                                | 0.060        |
| Efe-Ctu              | 230                                                     | 227          | 3                                         | 0.103                                                | 0.103        |

a. Taxon designations as in Table S3.

b. The 25 genes rejecting the species tree at  $P < 0.01$  are homologs of the *E. coli* genes *accB*, *acrF*, *argE*, *bamA*, *btuB*\*, *dnaB*, *eptB*, *fabB*, *fadL*\*, *fepA*\*, *fhuA*\*, *fliD*, *glmS*, *glnP*, *mazG*, *murA*, *purA*, *rfe*, *rpsN*, *rsd*, *suhB*, *tppB*, *ybaP*, *ycbB* and *yeeF*. Genes marked with an asterisk are outer-membrane proteins (Table S9).



**Table S9.** Excess of genes showing changes in codon selection as a function of protein product location among 2235 genes shared among 8 taxa.

| Comparison           | Genes with significant change in $ACE_u$ ( $P < 0.01$ ) |               |                        | Fraction of Genes With Significant Change in $ACE_u$ |               |
|----------------------|---------------------------------------------------------|---------------|------------------------|------------------------------------------------------|---------------|
|                      | All Genes                                               | Non-OMP genes | OMP Genes <sup>b</sup> | All Genes                                            | Non-OMP genes |
| Cro-Cko <sup>a</sup> | 34                                                      | 31            | 3                      | 0.015                                                | 0.014         |
| Cro-Ecl              | 32                                                      | 30            | 2                      | 0.014                                                | 0.014         |
| Cro-Eco              | 122                                                     | 118           | 4                      | 0.055                                                | 0.053         |
| Cro-Sen              | 40                                                      | 40            | 0                      | 0.018                                                | 0.018         |
| Cro-Sty              | 38                                                      | 38            | 0                      | 0.017                                                | 0.017         |
| Cro-Efe              | 118                                                     | 114           | 4                      | 0.053                                                | 0.052         |
| Cro-Ctu              | 62                                                      | 61            | 1                      | 0.028                                                | 0.028         |
| Cko-Ecl              | 43                                                      | 41            | 2                      | 0.019                                                | 0.019         |
| Cko-Eco              | 68                                                      | 64            | 4                      | 0.030                                                | 0.029         |
| Cko-Sen              | 21                                                      | 21            | 0                      | 0.009                                                | 0.010         |
| Cko-Sty              | 24                                                      | 23            | 1                      | 0.011                                                | 0.010         |
| Cko-Efe              | 71                                                      | 68            | 3                      | 0.032                                                | 0.031         |
| Cko-Ctu              | 104                                                     | 102           | 2                      | 0.047                                                | 0.046         |
| Ecl-Eco              | 112                                                     | 107           | 5                      | 0.050                                                | 0.048         |
| Ecl-Sen              | 73                                                      | 72            | 1                      | 0.033                                                | 0.033         |
| Ecl-Sty              | 76                                                      | 74            | 2                      | 0.034                                                | 0.034         |
| Ecl-Efe              | 125                                                     | 121           | 4                      | 0.056                                                | 0.055         |
| Ecl-Ctu              | 64                                                      | 62            | 2                      | 0.029                                                | 0.028         |
| Eco-Sen              | 66                                                      | 63            | 3                      | 0.030                                                | 0.029         |
| Eco-Sty              | 71                                                      | 67            | 4                      | 0.032                                                | 0.030         |
| Eco-Efe              | 6                                                       | 4             | 2                      | 0.003                                                | 0.002         |
| Eco-Ctu              | 206                                                     | 202           | 4                      | 0.092                                                | 0.092         |
| Sen-Sty              | 2                                                       | 2             | 0                      | 0.001                                                | 0.001         |
| Sen-Efe              | 71                                                      | 70            | 1                      | 0.032                                                | 0.032         |
| Sen-Ctu              | 113                                                     | 112           | 1                      | 0.051                                                | 0.051         |
| Sty-Efe              | 62                                                      | 61            | 1                      | 0.028                                                | 0.028         |
| Sty-Ctu              | 134                                                     | 133           | 1                      | 0.060                                                | 0.060         |
| Efe-Ctu              | 230                                                     | 228           | 2                      | 0.103                                                | 0.103         |

a. Taxon designations as in Table S3.

b. Homologs of the *E. coli* genes *bamC*, *blc*, *btuB\**, *fadL\**, *fepA\**, *fhuA\**, *hofQ*, *lamB*, *m1aA*, *m1tA*, *m1tB*, *m1tC*, *m1tD*, *nfrA*, *ompA*, *ompC*, *ompW*, *ompX*, *pal*, *pgpB*, *skp*, *slyB*, *tolC*, *tsx*, *wza*, *ybhC* and *yeaY*. The phylogeny of genes marked with an asterisk reject the species tree at  $P < 0.01$  (Table S8).
